# Supplementary material
Source: PubMed Central journal article supplement (PMC5148670)
Supplement: NIHMS824093-supplement-Material_and_Methods.pdf [file NIHMS824093-supplement-Material_and_Methods.pdf]

## SUPPORTING INFORMATION

### Structure Based Design of a Covalent Inhibitor of the SET Domain-Containing Protein 8 (SETD8)

#### Lysine Methyltransferase

Kyle V. Butler<sup>1#</sup>, Anqi Ma<sup>1#</sup>, Wenyu Yu<sup>2#</sup>, Fengling Li<sup>2</sup>, Fabio Pittella-Silva<sup>3</sup>, Shawna L. Organ<sup>2</sup>,  
Wolfram Tempel<sup>2</sup>, Nicolas Babault<sup>1</sup>, Fabio Pittella-Silva<sup>3</sup>, Jason Shao<sup>1</sup>, Junyi Wang<sup>3</sup>, Dalia Barsyte-  
Lovejoy<sup>2</sup>, Masoud Vedadi<sup>2,4</sup>, Minkui Luo<sup>3</sup>, Peter J. Brown<sup>2</sup>, Cheryl H. Arrowsmith<sup>2,4</sup>, Jian Jin<sup>1\*</sup>

#### Table of Contents

|    |                        |     |
|----|------------------------|-----|
| A. | Supplementary Figure 1 | S2  |
| B. | Supplementary Figure 2 | S3  |
| C. | Supplementary Figure 3 | S4  |
| D. | Supplementary Figure 4 | S5  |
| E. | Supplementary Figure 5 | S6  |
| G. | NMR Spectra            | S7  |
| H. | Extended Data Table 1  | S11 |

## Supplementary Figures

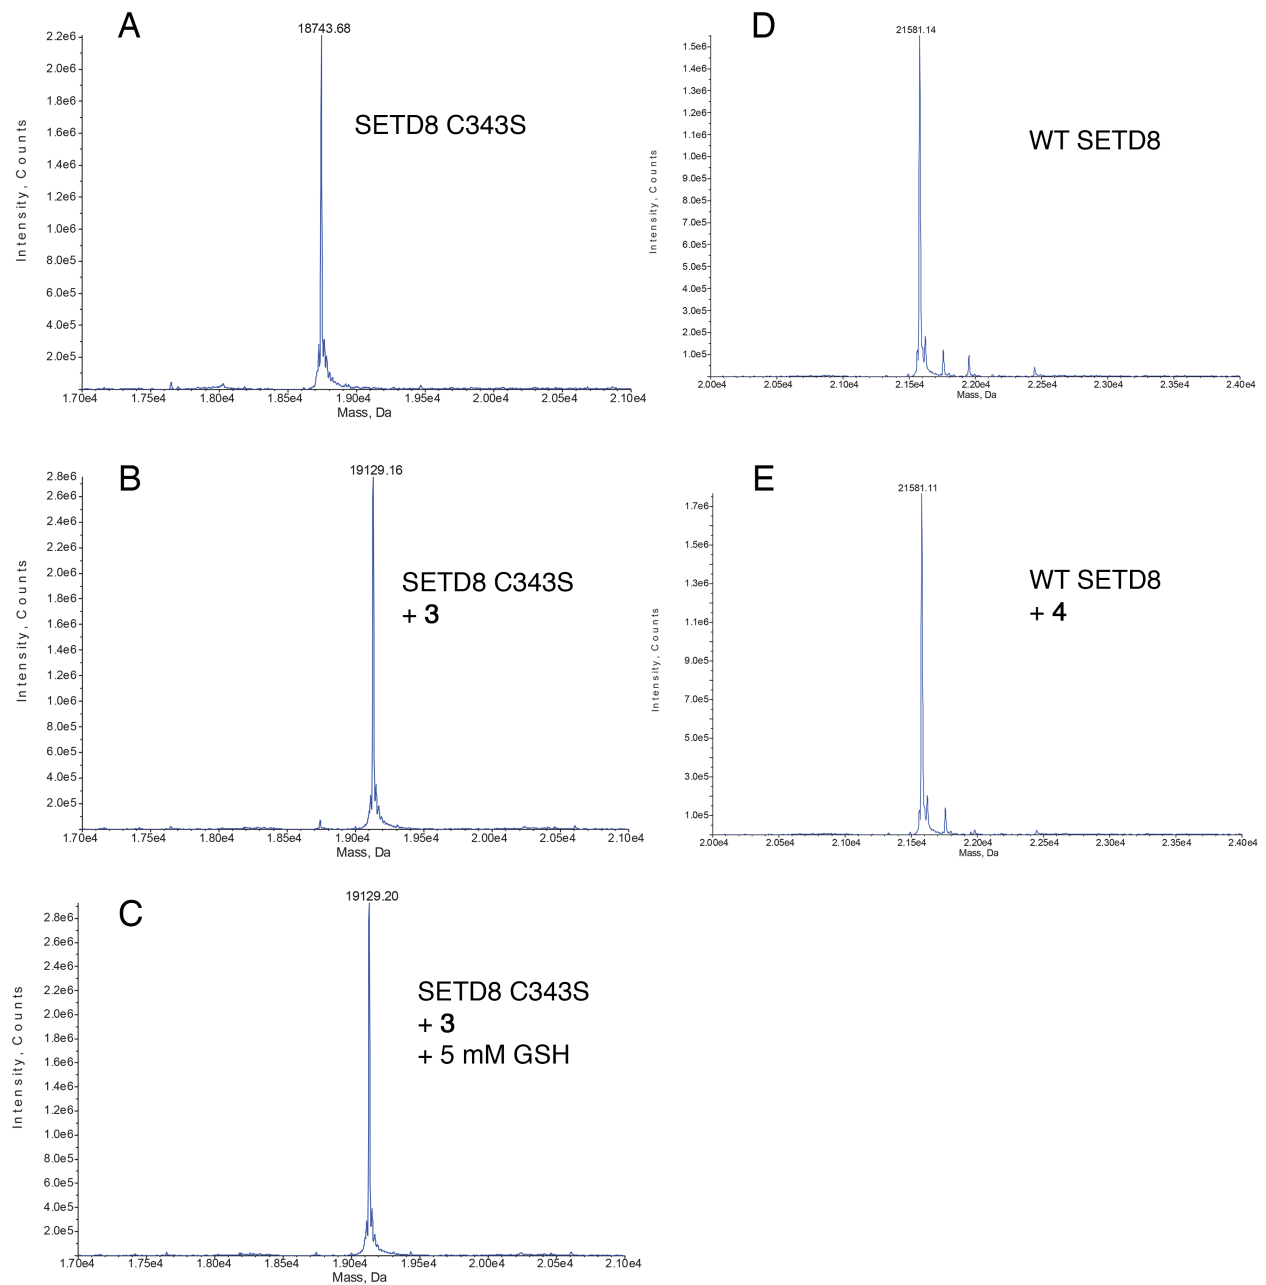

**Supplementary Figure 1.** Mass Spectrometry results of covalent modification of SETD8. (A) SETD8 C343S. (B) SETD8 C343S + 3. (C) SETD8 C343S + 3 + 5 mM glutathione (GSH). (D) SETD8. (E) SETD8 + 4.

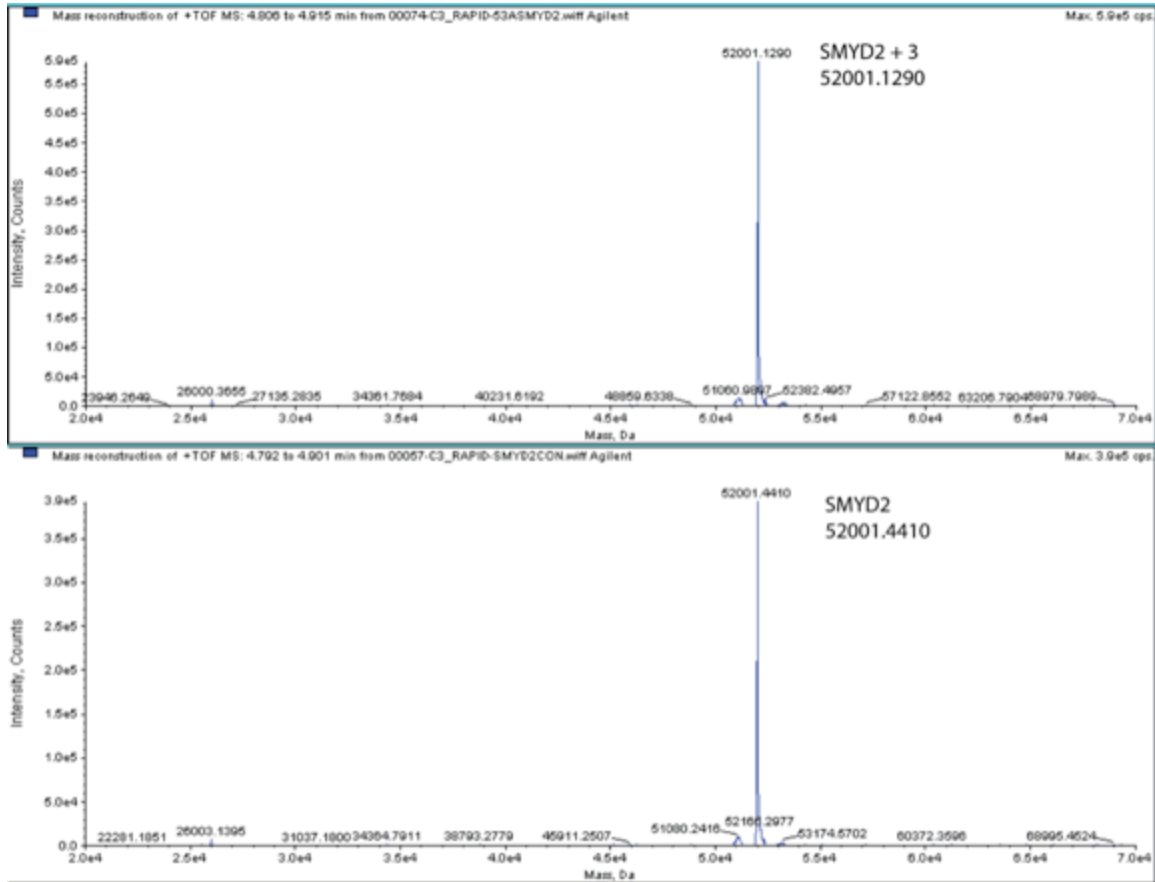

Supplementary Figure 2. Mass Spectrometry of SMYD2 with and without addition of 3.

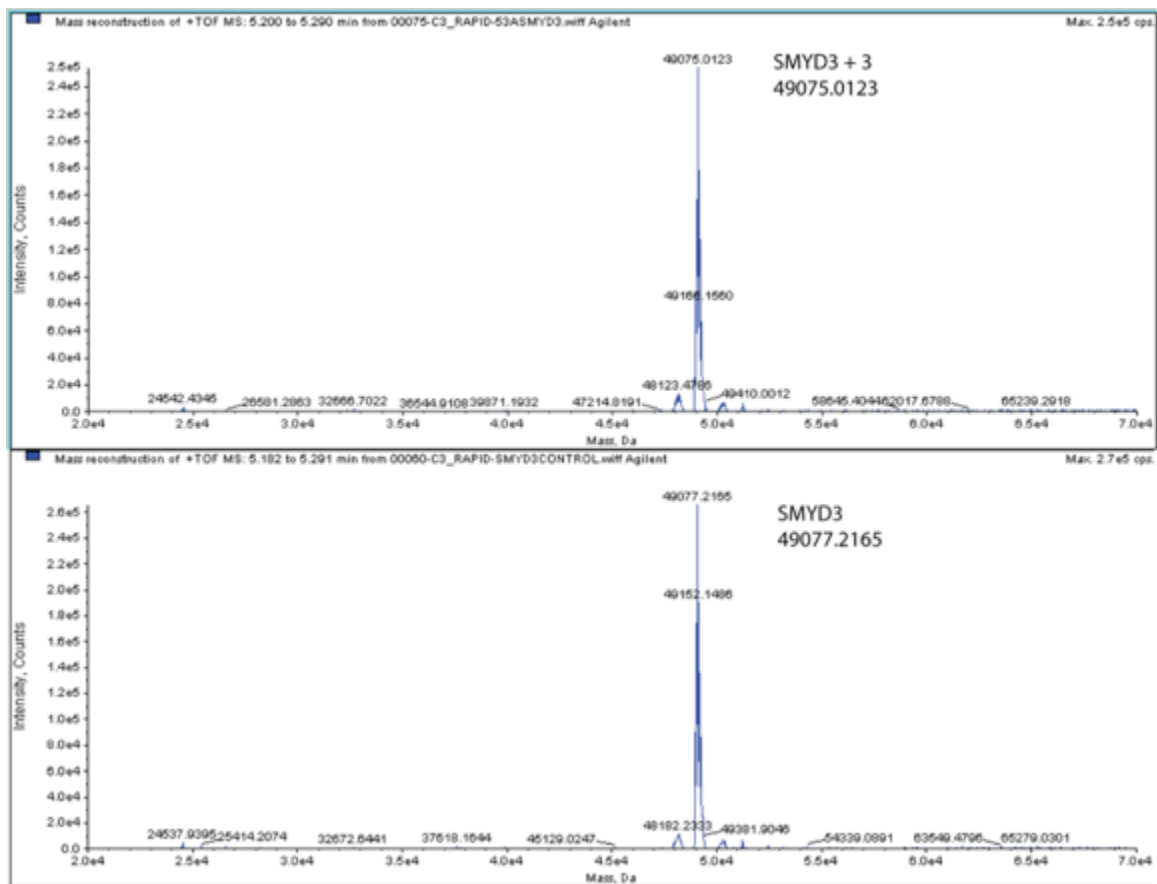

**Supplementary Figure 3.** Mass Spectrometry of SMYD3 with and without addition of **3**.

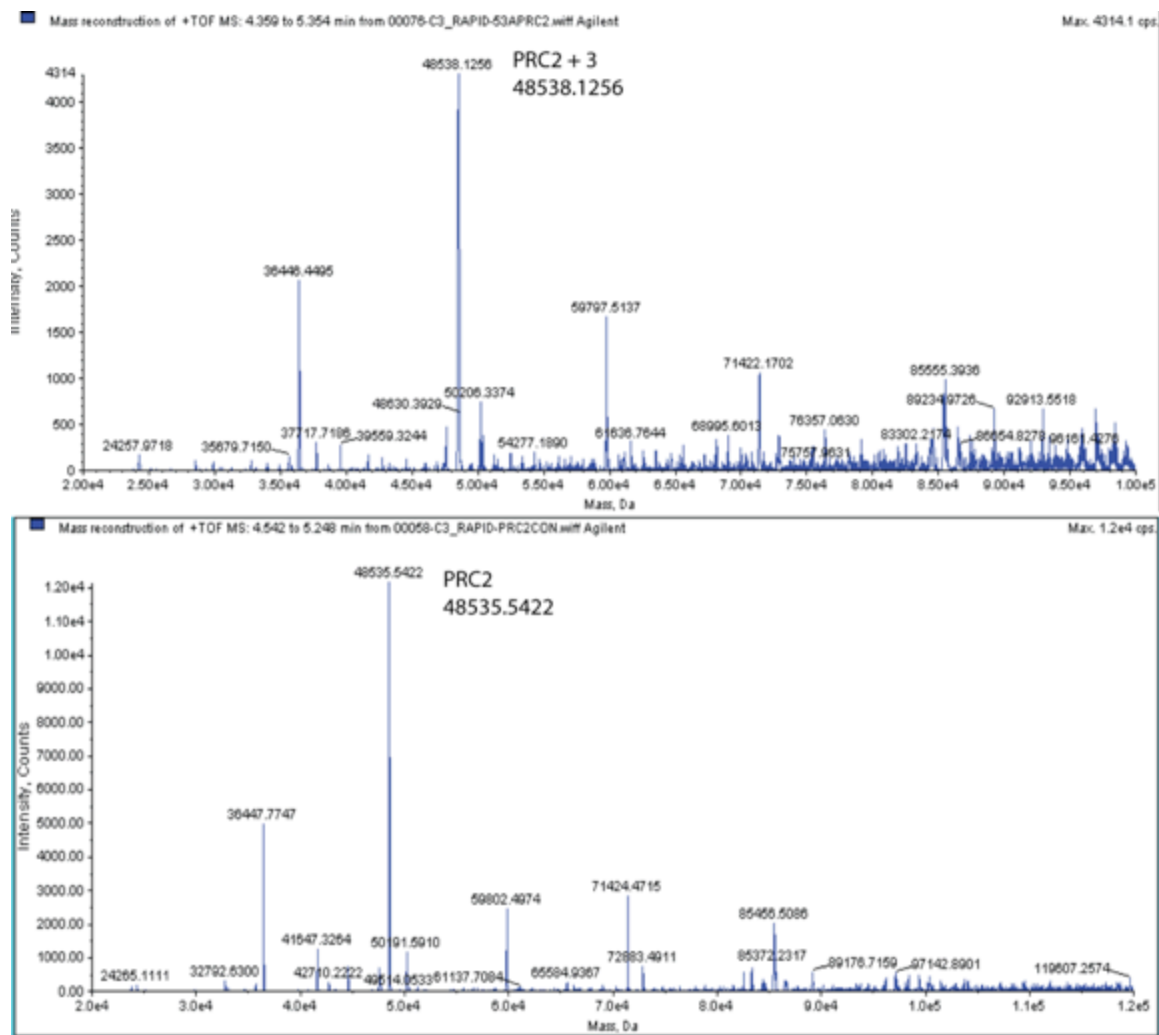

Supplementary Figure 4. Mass Spectrometry of PRC2 with and without addition of 3.

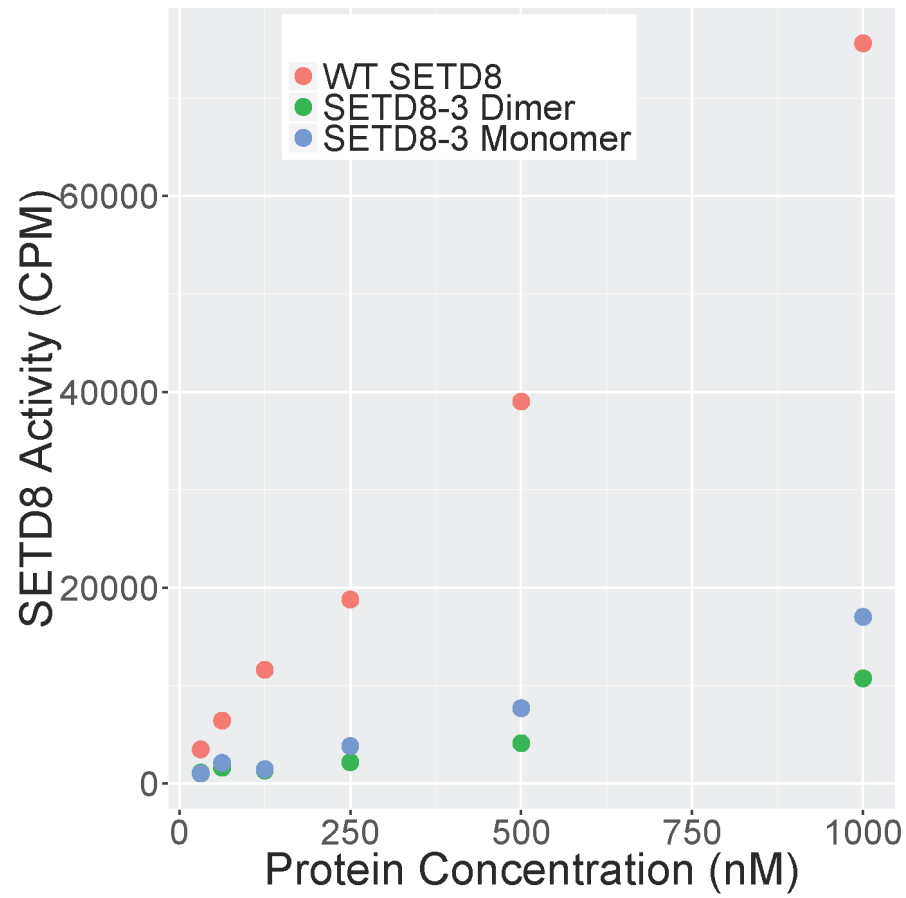

**Supplementary Figure 5.** Residual activity of the SETD8-3 adduct in both monomer and dimer form compared to that of wild type SETD8.

# NMR Spectra

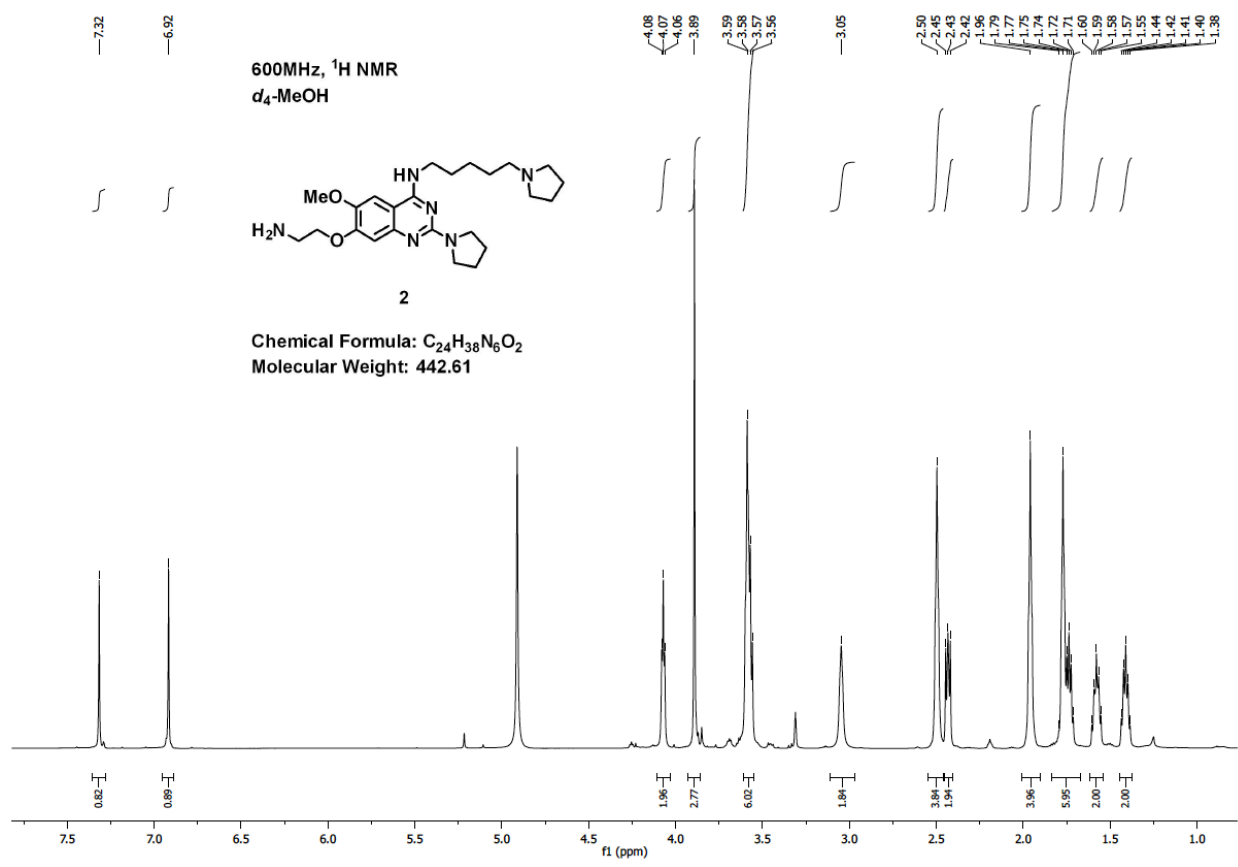

<sup>1</sup>H NMR of **2**.

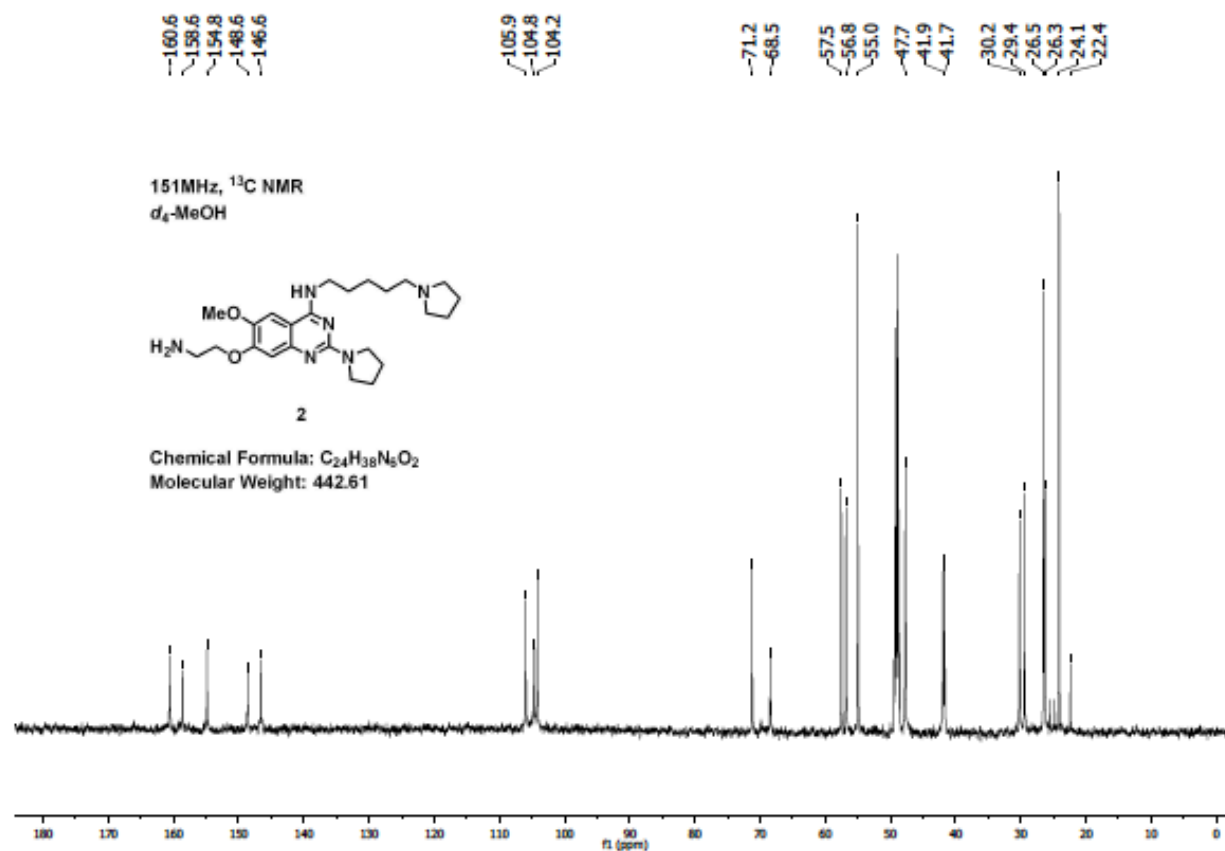

<sup>13</sup>C NMR of 2.



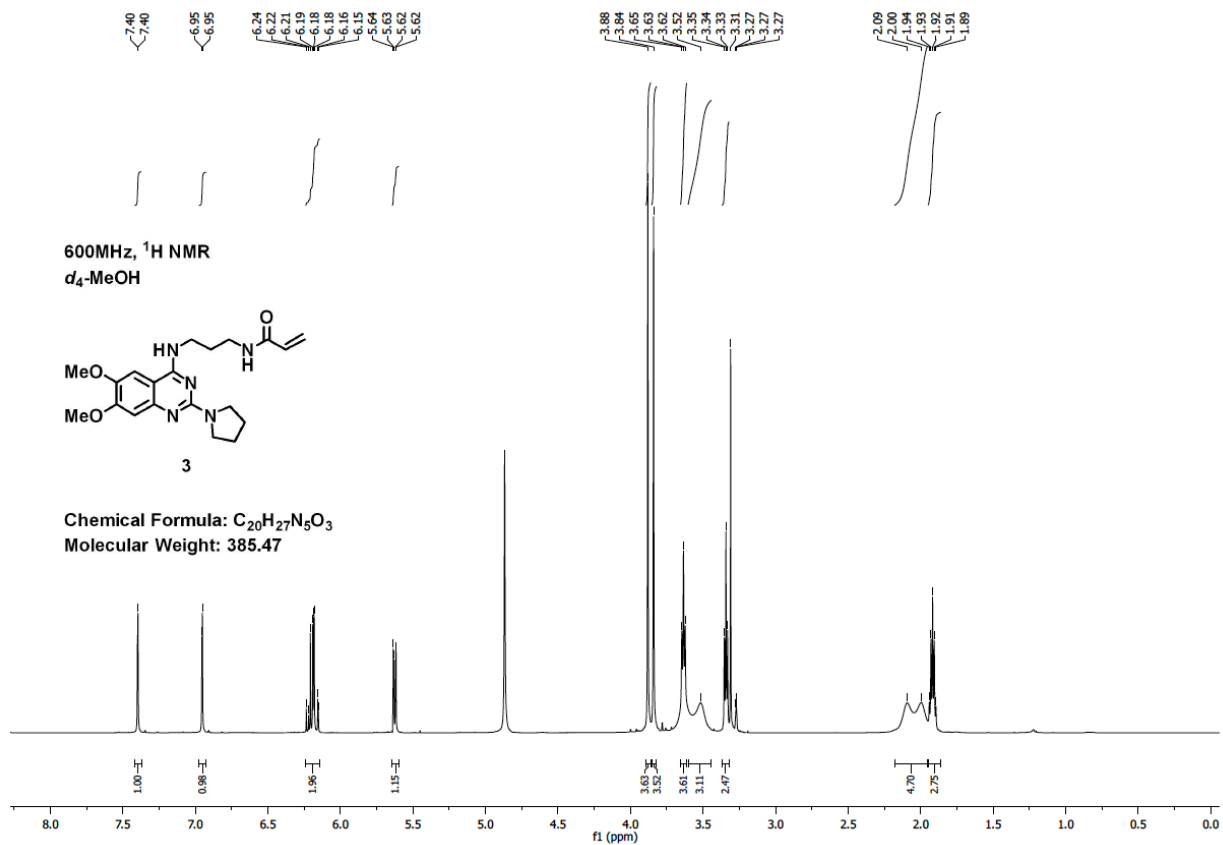

<sup>1</sup>H NMR of **3**.

168.22  
 160.18  
 156.91  
 151.30  
 148.59  
 136.80  
 131.99  
 126.82  
 104.72  
 103.43  
 99.52  
 56.88  
 56.81  
 47.40  
 40.36  
 38.13  
 29.74  
 26.69  
 25.57

151MHz, <sup>13</sup>C NMR  
d<sub>4</sub>-MeOH

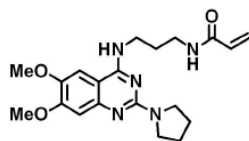

3

Chemical Formula: C<sub>20</sub>H<sub>27</sub>N<sub>5</sub>O<sub>3</sub>  
Molecular Weight: 385.47

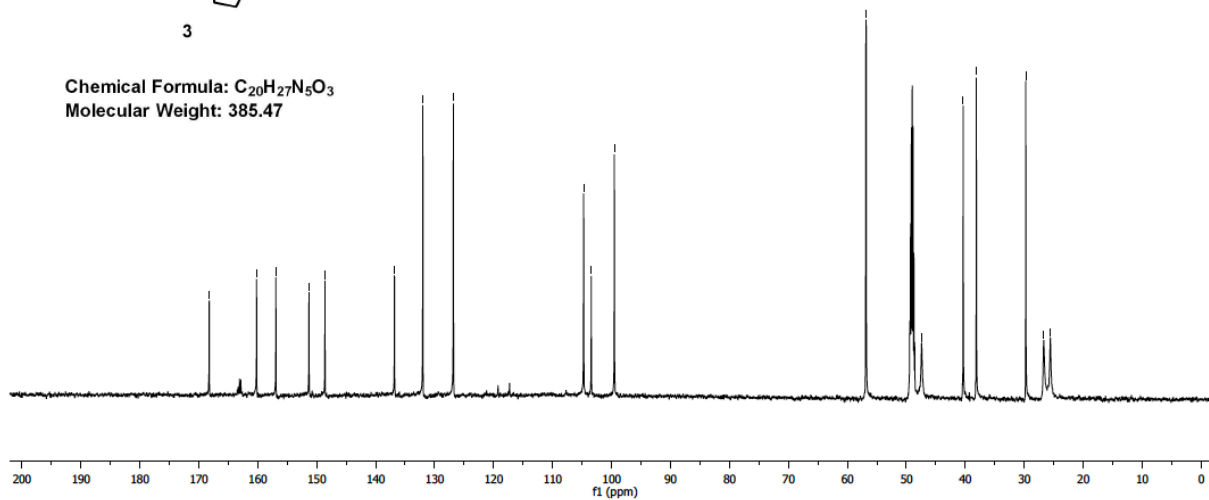

<sup>13</sup>C NMR of 3.

**Extended Data Table 1** Data collection and refinement statistics (**Molecular replacement**)

|                                                      | SETD8/2<br>(PDB: 5T5G)  | SETD8/3<br>(PDB: 5TH7)  |
|------------------------------------------------------|-------------------------|-------------------------|
| <b>Data collection</b>                               |                         |                         |
| Space group                                          | P3 <sub>2</sub> 21      | C2                      |
| Cell dimensions                                      |                         |                         |
| <i>a</i> , <i>b</i> , <i>c</i> (Å)                   | 74.58, 74.58, 111.47    | 83.15, 31.64, 114.89    |
| $\alpha$ , $\beta$ , $\gamma$ (°)                    | 88.96, 88.96, 34.99     | 90.00, 105.23, 90.00    |
| Molecule per asymmetric unit                         | 1                       | 2                       |
| Resolution (Å)                                       | 44.48-2.10 (2.16-2.10)* | 37.51-1.95 (2.00-1.95)* |
| <i>R</i> <sub>sym</sub> or <i>R</i> <sub>merge</sub> | 0.081 (0.982)           | 0.084 (0.842)           |
| <i>I</i> / <i>sI</i>                                 | 19.9 (3.1)              | 11.2 (1.3)              |
| Completeness (%)                                     | 99.9 (100.0)            | 99.0 (94.5)             |
| Redundancy                                           | 10.7 (11.1)             | 3.4 (2.6)               |
| <b>Refinement</b>                                    |                         |                         |
| Resolution (Å)                                       | 2.10                    | 1.95                    |
| No. unique reflections                               | 9530 (775)              | 21342 (1397)            |
| <i>R</i> <sub>work</sub> / <i>R</i> <sub>free</sub>  | 0.204/0.227             | 0.189/0.237             |
| No. atoms /average B-factor<br>[Å <sup>2</sup> ]     | 1145/54.8               | 2366/38.3               |
| Protein                                              | 1077/55.2               | 2189/38.9               |
| Ligand/ion                                           | 43/51.4                 | 56/22.4                 |
| Water                                                | 20/40.2                 | 96/34.8                 |
| Other                                                | 5/48.9                  | 25/34.9                 |
| R.m.s deviations                                     |                         |                         |
| Bond lengths (Å)                                     | 0.014                   | 0.010                   |
| Bond angles (°)                                      | 1.5                     | 1.1                     |
| Ramachandran plot                                    |                         |                         |
| Most favoured (%)                                    | 97.87                   | 97.23                   |
| Additional allowed (%)                               | 2.13                    | 2.78                    |
| Outliers (%)                                         | 0                       | 0                       |
| Protein Data Bank entry                              | --                      | --                      |

\*The values in parentheses refer to statistics in the highest bin.
